# Supplementary material for: Identification and quantification of pigments in plant leaves using thin layer chromatography-Raman spectroscopy (TLC-Raman)
Source: Royal Society of Chemistry journal article supplement (doi:10.1039/d4ay00082j), 2024-01-01
Supplement: d4ay00082j1.pdf [file d4ay00082j1.pdf]

## Supplementary Information

### Identification and quantification of pigments in plant leaves using thin layer chromatography- Raman spectroscopy (TLC- Raman)

Taylor D. Payne, Lily R. Dixon, Fiona C. Schmidt, Joshua J. Blakeslee, Alison E. Bennett, and Zachary D. Schultz\*

#### Corresponding Author:

\***Zachary D. Schultz** - *Department of Chemistry and Biochemistry, The Ohio State University, Columbus, Ohio 43210, United States; orcid.org/0000-0003-1741-8801; Email: schultz.133@osu.edu*

#### Other Authors:

Taylor D. Payne- *payne.737@osu.edu* (orcid.org/0009-0004-3380-140X)

Lily R. Dixon- *dixon.925@osu.edu*

Fiona C. Schmidt- *schmidt.1009@osu.edu*

Joshua J. Blakeslee- *blakeslee.19@osu.edu*

Alison E. Bennett- *bennett.1242@osu.edu*

#### Table of Contents for Supplementary Figures:

|                                                                                                                         |    |
|-------------------------------------------------------------------------------------------------------------------------|----|
| <b>Figure S1:</b> ESI LC-MS spectra from $\beta$ -carotene and lutein.....                                              | 2  |
| <b>Figure S2:</b> Solvent-related changes in Raman shift ( $\text{cm}^{-1}$ ) of C=C stretch of $\beta$ -carotene ..... | 3  |
| <b>Figure S3:</b> Images of TLC plates for calibration curves.....                                                      | 4  |
| <b>Figure S4:</b> Raman calibration curve for $\beta$ -carotene on TLC plate using larger drops.....                    | 5  |
| <b>Figure S5:</b> Standard addition curve for leaf extract spiked with $\beta$ -carotene .....                          | 6  |
| <b>Figure S6:</b> Raman spectra of all pigment spots on TLC plate .....                                                 | 7  |
| <b>Figure S7:</b> TLC-Raman calibration curve for lutein.....                                                           | 8  |
| <b>Figure S8:</b> Quantification of lutein in spinach leaf extract .....                                                | 9  |
| <b>Figure S9:</b> Coinciding molecules present in lutein TLC spot as identified by UV-Vis.....                          | 10 |
| <b>Figure S10:</b> Handheld Raman signal of chlorophyll at 785 nm.....                                                  | 11 |
| Calibration curve calculations for detection limit, quantification limit, and standard error in concentration .....     | 12 |

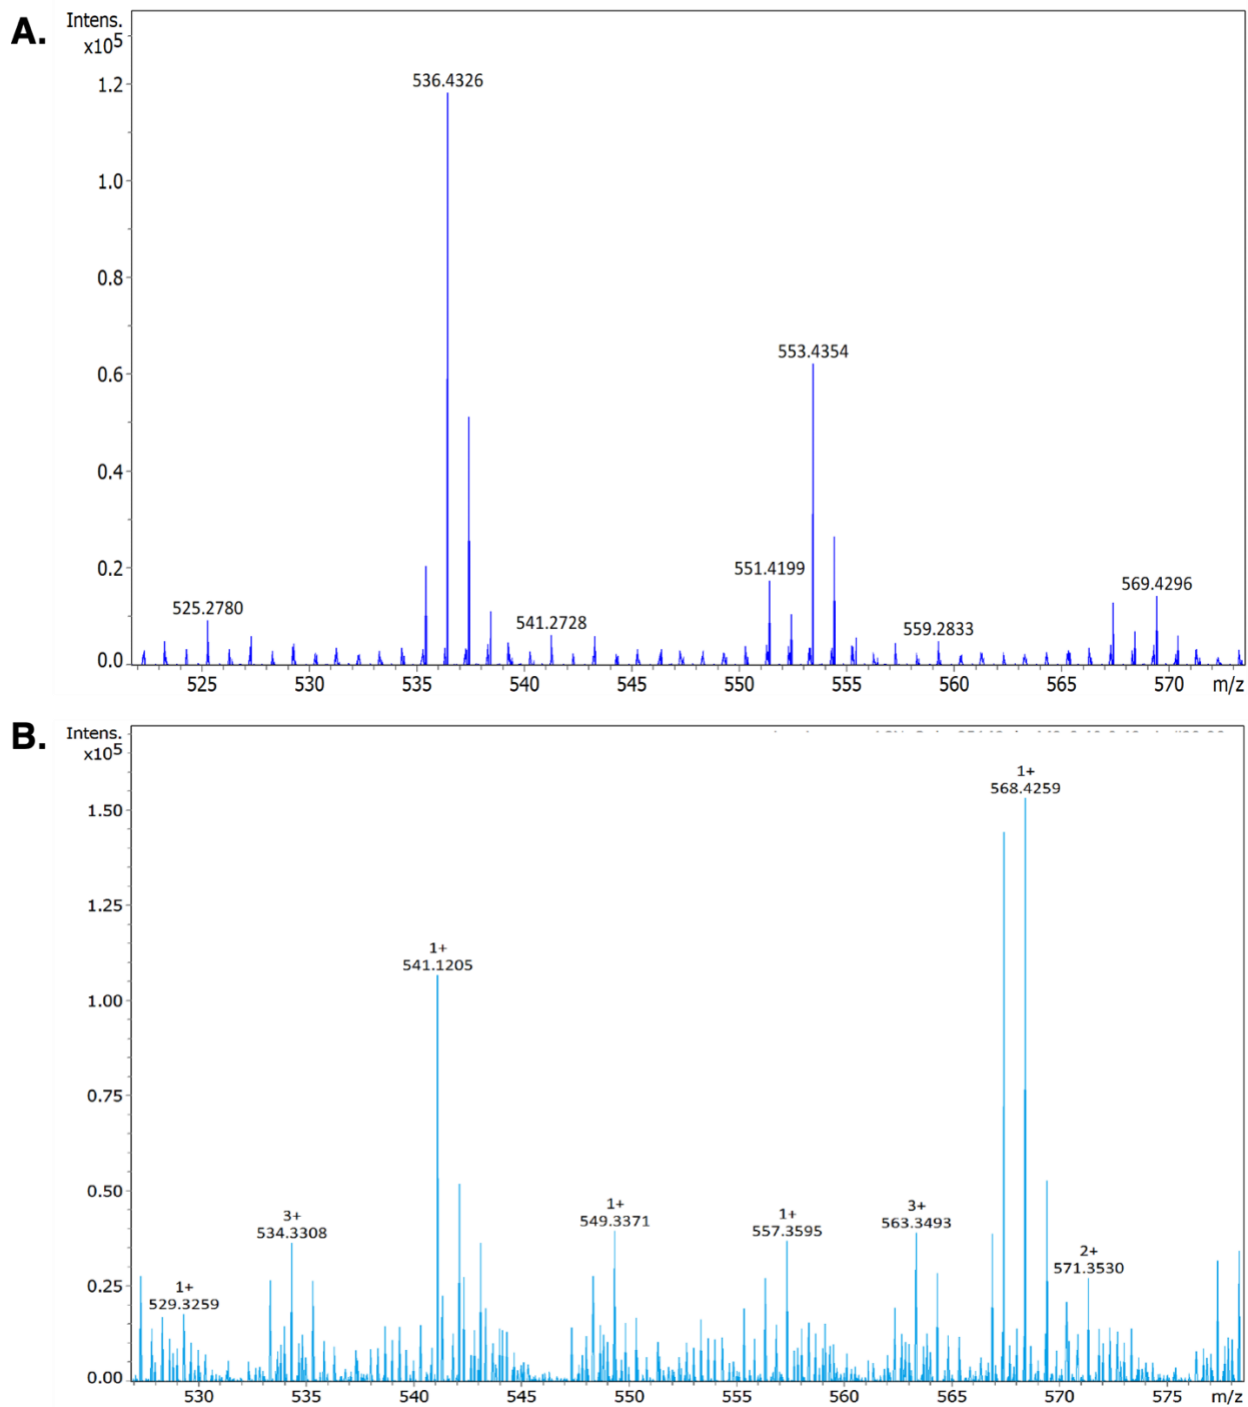

**Figure S1.** Positive mode ESI LC-MS spectra from (A)  $\beta$ -carotene and (B) lutein standards used for all experiments. In the top spectrum, the peak at 536.43 m/z corresponds to  $M^+$  where 536.43 is the exact mass of  $\beta$ -carotene. In the bottom spectrum, the peak at 568.43 m/z corresponds to  $M^+$  where 568.43 is the exact mass of lutein.

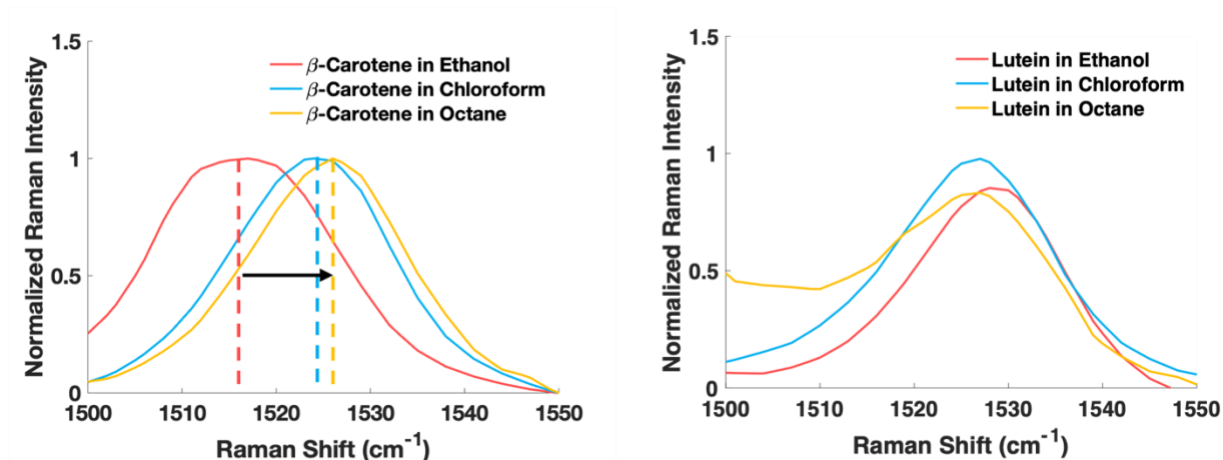

| Solvent    | Polarity | Polarizability | C=C Raman shift (cm <sup>-1</sup> ) |        |
|------------|----------|----------------|-------------------------------------|--------|
|            |          |                | β-Carotene                          | Lutein |
| Octane     | Nonpolar | High           | 1526                                | 1527   |
| Chloroform | Moderate | Medium         | 1524                                | 1527   |
| Ethanol    | High     | Low            | 1517                                | 1528   |

**Figure S2.** Solvent-related changes in Raman shift (cm<sup>-1</sup>) of C=C stretch of β-carotene, as compared to relatively constant Raman shift (cm<sup>-1</sup>) of C=C stretch of lutein, using handheld device.

A Metrohm MiraDS handheld spectrometer equipped with a 785 nm laser and intelligent Universal Attachment was used to collect Raman spectra from solutions of β-carotene and lutein in different solvents. These solvents include octane, chloroform, and ethanol, in order of increasing polarity and decreasing polarizability.<sup>2,3</sup> Samples were dropped onto a gold-coated glass slide, and three spectra from each sample were acquired in orbital raster scanning mode using an acquisition time of 5 s with 37 mW power. The spectra for each sample were averaged, and the height of the peak at ~1520 cm<sup>-1</sup> was normalized to 1 for comparison of spectra. For β-carotene, the center of the C=C stretching band shifts to the right with decreasing degree of solvent polarity and increasing polarizability. For lutein, the center of the C=C Raman peak remains relatively unchanged based on solvent.

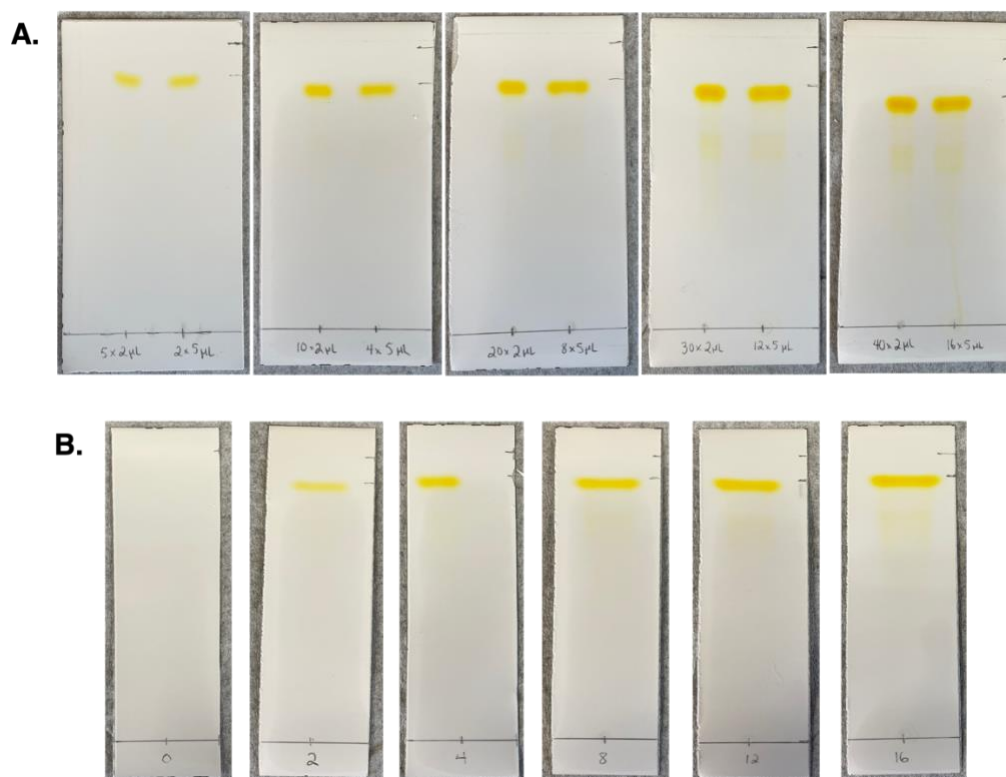

**Figure S3.** Images of TLC plates from which data was collected for (A) TLC-Raman calibration curves for  $\beta$ -carotene using different numbers of both small ( $2 \mu\text{L}$ ) and large ( $5 \mu\text{L}$ ) drops and for (B) TLC-UV-Vis calibration curve for  $\beta$ -carotene with different numbers of  $5 \mu\text{L}$  drops.  $R_f = 0.9$  for all spots.

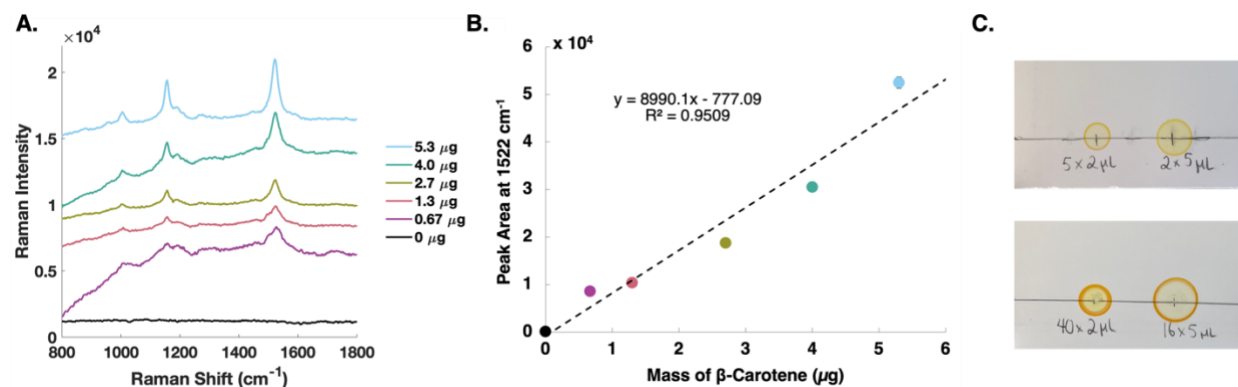

**Figure S4.** Raman spectroscopy-based calibration curve for  $\beta$ -carotene on TLC plate using larger drops. **(A)** Average Raman spectra from different quantities of  $\beta$ -carotene spotted onto TLC plate using  $5 \mu\text{L}$  drops. Spectra are offset for clarity. **(B)** Plot of average peak area at  $1522 \text{ cm}^{-1}$  as a function of  $\beta$ -carotene mass loaded onto TLC plate. Standard deviations are included as error bars. **(C)** Comparison of pre-development spot sizes from  $2 \mu\text{L}$  vs.  $5 \mu\text{L}$  drops of sample used to achieve  $0.67 \mu\text{g}$  (top) and  $5.3 \mu\text{g}$  (bottom). Linear fit ( $R^2$ ) and sensitivity ( $m$ ) of this calibration curve are both decreased compared to similar calibration curve created with smaller ( $2 \mu\text{L}$ ) drops.

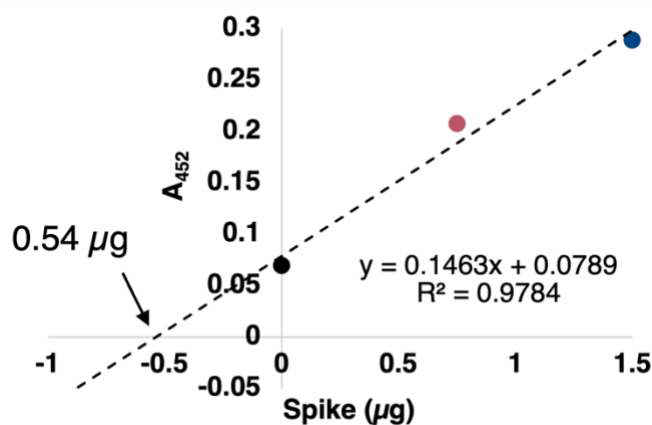

**Figure S5.** Standard addition curve created using UV-Vis data from leaf extract samples spiked with varying amounts of  $\beta$ -carotene.

Absorbance values at 452 nm are plotted against mass of  $\beta$ -carotene used to spike extract sample. A linear fit is applied to the data, and the fitted line is extrapolated to cross the x-axis. The amount of analyte in the original extract sample is calculated as “-a” where a is the x-intercept.<sup>1</sup> This calculation gives a  $\beta$ -carotene mass of  $0.54 \pm 0.14 \mu\text{g}$ , reported with error being equal to standard deviation in concentration ( $S_x$ ).  $S_x$  is calculated by the equation  $S_x = \frac{S_y}{m} \sqrt{\frac{1}{N} + \frac{\bar{y}^2}{m^2 S_{xx}}}$ , where  $S_y$  is standard error in y, m is slope of calibration curve, N is the number of samples used to create the curve,  $\bar{y}$  is the average of the calibration values of  $y_i$ , and  $S_{xx}$  is the sum of squares of deviations of  $x_i$  values from  $\bar{x}$  with  $\bar{x}$  being mean value of  $x_i$ . Standard error calculations are shown below for UV-Vis quantification of  $\beta$ -carotene in unspiked extract sample based on standard addition curve.

| $x_i$ | $y_i$    |
|-------|----------|
| 0.00  | 0.069484 |
| 0.75  | 0.207434 |
| 1.50  | 0.288942 |

$$S_y = 0.015135$$

$$m = 0.146306$$

$$N = 3$$

$$\bar{y} = 0.18862$$

$$S_{xx} = 1.1250$$

$$S_x = 0.139205$$

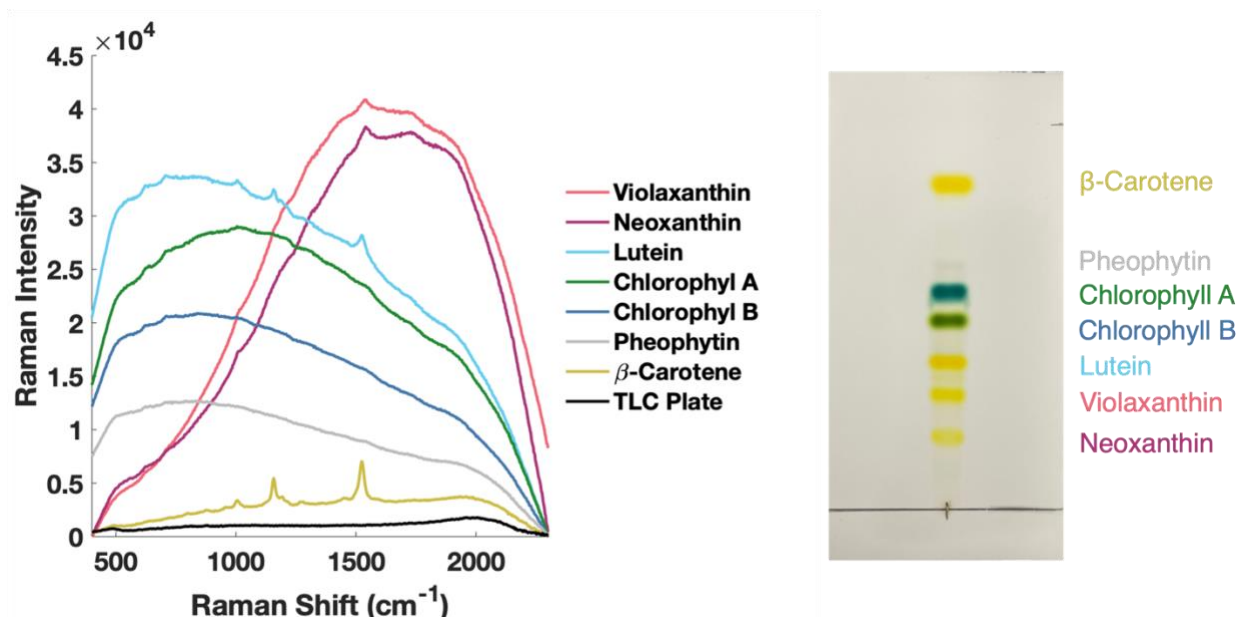

**Figure S6.** Raman spectra of all pigment spots on TLC plate spotted with spinach leaf extracts.

Organic spinach leaves were purchased from the grocery store and extracted by freezing at  $-80\text{ }^{\circ}\text{C}$ , grinding with a mortar and pestle, and soaking in ethanol. A 2 mL aliquot of spinach extract was dried down under  $\text{N}_2(\text{g})$  and resuspended in 100  $\mu\text{L}$  of acetone. Ten successive 2  $\mu\text{L}$  drops of extract were spotted onto the TLC plate. The plate was developed with mobile phase (petroleum ether:cyclohexane:ethyl acetate:acetone:ethanol (60:16:10:10:6 v/v). Handheld Raman signal at 785 nm was recorded from all observed spots, assigned  $\beta$ -carotene ( $R_f = 0.9$ ), pheophytin, chlorophyll A, chlorophyll B, lutein ( $R_f = 0.4$ ), violaxanthin, and neoxanthin (from top to bottom). Power and time used for acquisitions was 23 mW and 10 s for  $\beta$ -carotene, pheophytin, and the control spot on the plate. Acquisition times were reduced to 5 s for lutein, 2 s for neoxanthin, and 1 s for violaxanthin, but power was maintained at 23 mW. Power and time were both reduced to 12 mW and 1 s, respectively, for chlorophyll spots. All pigment spots besides  $\beta$ -carotene exhibit intense fluorescence. The silica plate itself shows minimal background signal.

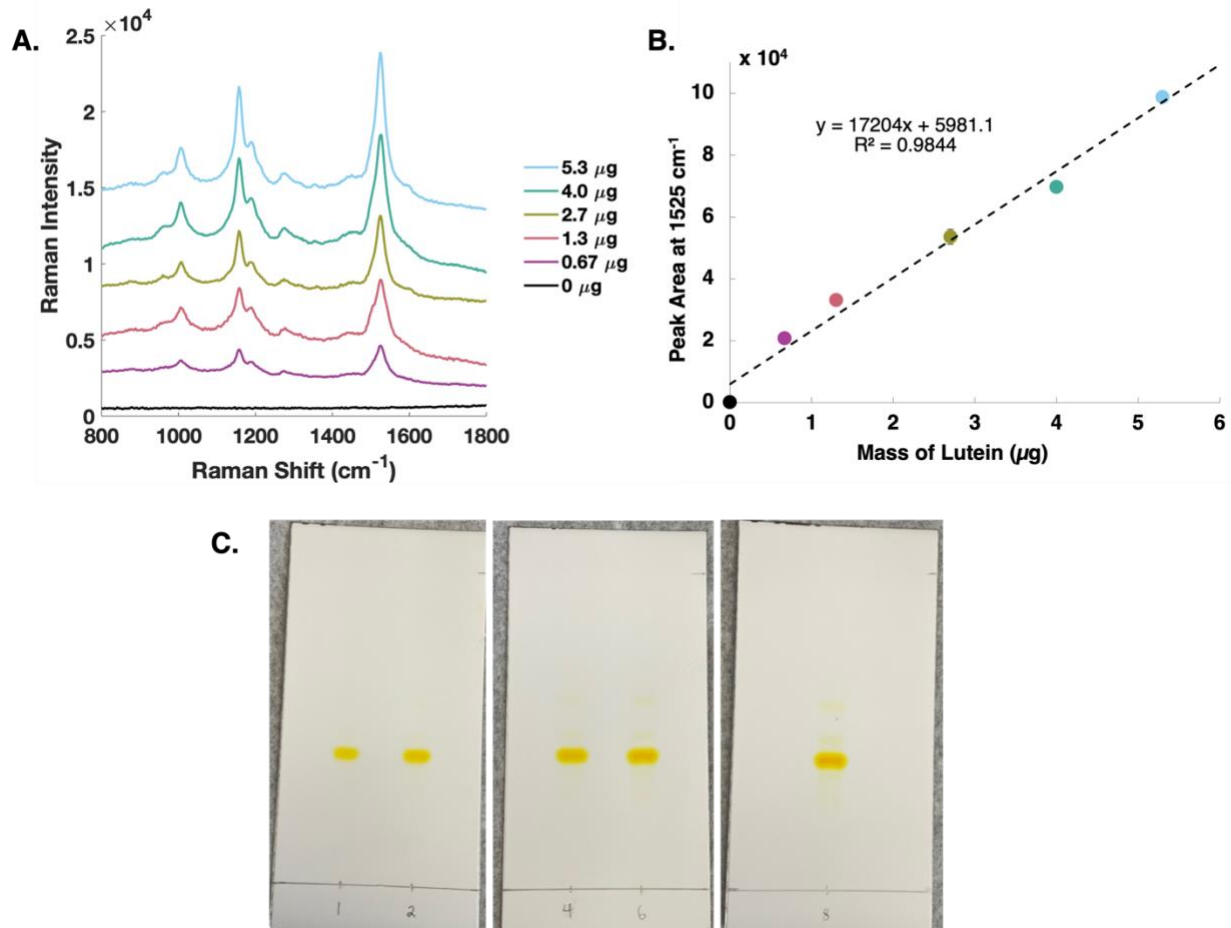

**Figure S7.** TLC-Raman calibration curve for lutein. **(A)** Average Raman spectra from different amounts of lutein spotted onto TLC plate using 2  $\mu\text{L}$  drops. Spectra are offset for clarity. **(B)** Calibration plot showing average peak area at 1525  $\text{cm}^{-1}$  with respect to lutein mass dropped onto TLC plate. Standard deviations are included as error bars. **(C)** Images of TLC plates used to make calibration curve with different numbers of 2  $\mu\text{L}$  drops. A 0.333  $\mu\text{g}/\mu\text{L}$  stock solution of lutein was prepared in acetone. Various masses of lutein ranging from 0 to 5.3  $\mu\text{g}$  were spotted with a consistent spot size onto TLC plates using different numbers of 2  $\mu\text{L}$  drops of the lutein stock solution. Plates were developed using mobile phase consisting of petroleum ether:cyclohexane:ethyl acetate:acetone:ethanol in a ratio of 60:16:10:10:6 v/v. Photos of each plate were taken, and  $R_f$  values were recorded as 0.4 for all spots. Handheld Raman spectra were acquired from each spot in triplicate using a Metrohm MiraDS at 785 nm with a power of 23 mW in raster scanning mode and an acquisition time of 5 s.



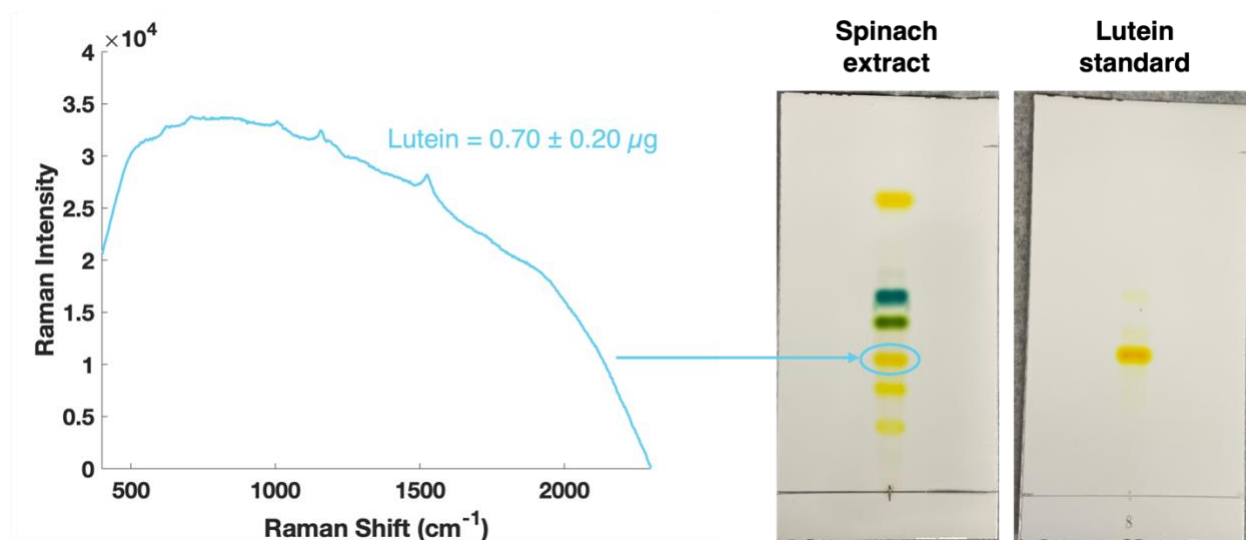

**Figure S8.** Quantification of lutein in spinach leaf extract.

A TLC plate was spotted with 10- 2  $\mu\text{L}$  drops of spinach leaf extract, then developed using the following mobile phase: petroleum ether:cyclohexane:ethyl acetate:acetone:ethanol (60:16:10:10:6 v/v). After taking a photo of the plate, the  $R_f$  value of the lutein spot was recorded as 0.4, which matches the  $R_f$  value of the lutein standard as shown. Handheld Raman spectra were acquired from the lutein spot in triplicate using a Metrohm MiraDS at 785 nm with a power of 23 mW in raster scanning mode and an acquisition time of 5 s. Raman peak area at  $1522\text{ cm}^{-1}$  was converted to lutein mass using the calibration curve in Figure S7, giving a value of  $0.70 \pm 0.20\ \mu\text{g}$  of lutein present in  $20\ \mu\text{L}$  of the spinach leaf extract.

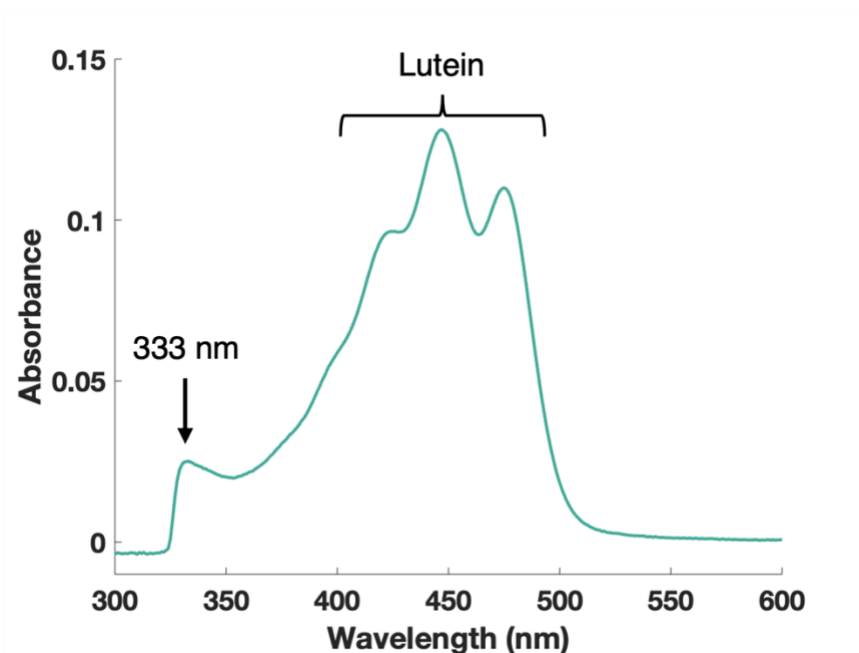

**Figure S9:** Coinciding molecules present in lutein TLC spot as identified by UV-Vis.

TLC spot of lutein was cut out from the plate, and deposited into a tube containing acetone. The silica was scraped from the plate into the acetone and shaken for 4 min to dissolve. The tube was then centrifuged at 3000 rcf for 1 min to pellet the silica, and the supernatant was transferred into a quartz cuvette. UV-Vis spectra ( $N = 3$ ) were collected from the supernatant using a Cary 4000 UV-Vis instrument baselined with acetone. Signal at 333 nm in UV-Vis spectra of TLC spot of lutein from spinach leaf extract indicates the presence of additional molecules besides lutein, likely phenolics such as flavonoids, as identified in literature.<sup>4</sup>

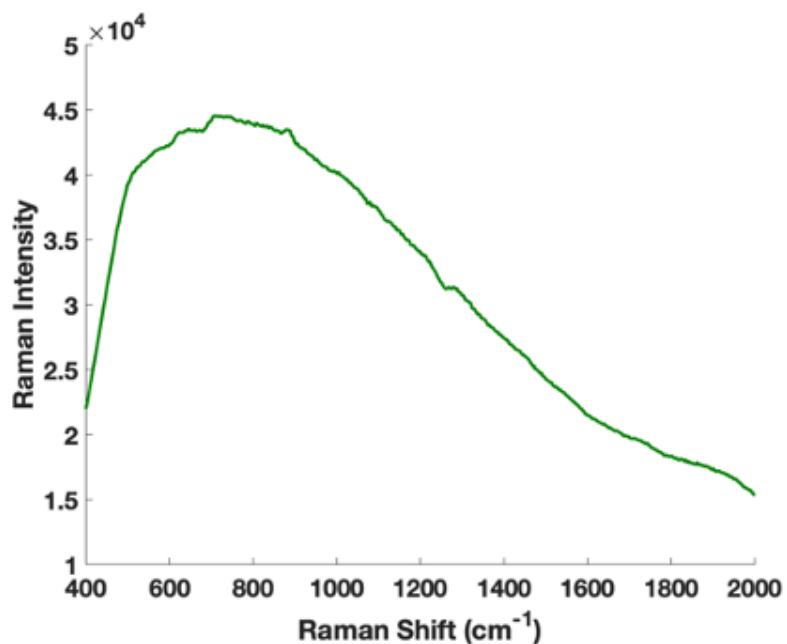

**Figure S10.** Handheld Raman signal of chlorophyll at 785 nm.

Chlorophyll A was dissolved in ethanol, and solution was dropped onto a gold-coated glass slide. Handheld Raman spectra ( $N = 3$ ) were acquired using a Metrohm MiraDS at 785 nm in orbital raster scanning mode. Measurements were made using an acquisition time of 2 s with 23 mW of power at the sample. Spectra show intense fluorescence from the chlorophyll.

### Calibration curve calculations for detection limit, quantification limit, and standard error in concentration

The limit of detection (LOD) at 95% confidence is calculated by  $3s_{bl}/m$  where  $m$  is slope of the calibration curve and  $s_{bl}$  is standard deviation in blank signal. The limit of quantification (LOQ) at 95% confidence is calculated by  $10s_{bl}/m$  where  $m$  is slope of the calibration curve and  $s_{bl}$  is standard deviation in blank signal.<sup>1</sup>

#### LODs and LOQs for all calibration curves:

| Pigment           | Method                   | $s_{bl}$   | $m$     | LOD ( $\mu\text{g}$ ) | LOQ ( $\mu\text{g}$ ) |
|-------------------|--------------------------|------------|---------|-----------------------|-----------------------|
| $\beta$ -Carotene | UV-Vis                   | 0.00068265 | 0.13605 | 0.02                  | 0.05                  |
|                   | Raman (2 $\mu\text{L}$ ) | 189.44     | 19588   | 0.03                  | 0.10                  |
|                   | Raman (5 $\mu\text{L}$ ) | 189.44     | 8990.1  | 0.06                  | 0.21                  |
| Lutein            | Raman (2 $\mu\text{L}$ ) | 189.44     | 17204   | 0.03                  | 0.11                  |

The standard error in concentration<sup>1</sup> for each test sample is calculated using  $S_x = \frac{S_y}{m} \sqrt{\frac{1}{M} + \frac{1}{N} + \frac{(\bar{y}_c - \bar{y})^2}{m^2 S_{xx}}}$ . In this equation  $S_y$  is standard error in  $y$ ,  $m$  is slope of calibration curve,  $M$  is number of replicate measurements,  $N$  is the number of standards used to make the calibration curve,  $\bar{y}_c$  is the average response of the unknown,  $\bar{y}$  is the average of the calibration values of  $y_i$ , and  $S_{xx}$  is the sum of squares of deviations of  $x_i$  values from  $\bar{x}$  with  $\bar{x}$  being mean value of  $x_i$ . Standard error calculations are shown below for UV-Vis and Raman quantification of  $\beta$ -carotene in unspiked and spiked extract samples based on calibration curves in Figures 3 and 4 of the main text.

#### Standard errors for calibration curves used for quantification:

##### $\beta$ -Carotene UV-Vis:

| $x_i$ | $y_i$      |
|-------|------------|
| 0.0   | 0.01511145 |
| 0.67  | 0.09312303 |
| 1.3   | 0.21168757 |
| 2.7   | 0.38930144 |
| 4.0   | 0.52716053 |
| 5.3   | 0.75292506 |

$$S_y = 0.019004$$

$$m = 0.136054$$

$$M = 3$$

$$N = 6$$

$$\bar{y} = 0.331552$$

$$S_{xx} = 20.9921$$

| Spike ( $\mu\text{g}$ ) | $\bar{y}_c$ | $S_x$    |
|-------------------------|-------------|----------|
| 0                       | 0.0694837   | 0.114907 |
| 0.75                    | 0.207434    | 0.102610 |
| 1.50                    | 0.288942    | 0.099229 |

##### $\beta$ -Carotene Raman (2 $\mu\text{L}$ ):

| $x_i$ | $y_i$    |
|-------|----------|
| 0.0   | 138.6763 |
| 0.67  | 7072.652 |
| 1.3   | 18054.95 |
| 2.7   | 43156.83 |
| 4.0   | 82876.19 |
| 5.3   | 96653.91 |

$$S_y = 5479.641$$

$$m = 19587.68$$

$$M = 3$$

$$N = 6$$

$$\bar{y} = 41325.53$$

$$S_{xx} = 20.9921$$

| Spike ( $\mu\text{g}$ ) | $\bar{y}_c$ | $S_x$    |
|-------------------------|-------------|----------|
| 0                       | 6075.611    | 0.226282 |
| 0.75                    | 20090.32    | 0.208594 |
| 1.50                    | 34536.85    | 0.198941 |

##### Lutein Raman (2 $\mu\text{L}$ ):

| $x_i$ | $y_i$    |
|-------|----------|
| 0.0   | 138.6763 |
| 0.67  | 20840.56 |
| 1.3   | 33118.31 |
| 2.7   | 53619.12 |
| 4.0   | 69695.55 |
| 5.3   | 98820.21 |

$$S_y = 4390.999$$

$$m = 17204.43$$

$$M = 3$$

$$N = 6$$

$$\bar{y} = 46038.74$$

$$S_{xx} = 20.9921$$

For spinach leaf extract:

$$\bar{y}_c = 18037.33$$

$$S_x = 0.201965$$

## References

1. D. A. Skoog, F. J. Holler and S. R. Crouch, in *Principles of Instrumental Analysis*, Cengage Learning, Boston, MA, Seventh., 2018, pp. 11, 13–14, 18, 904.
2. Experimental Polarizabilities. <https://cccbdb.nist.gov/pollistx.asp> (accessed 2023-11-16).
3. L. R. Snyder, *Journal of Chromatography A*, 1974, **92**, 223–230.
4. I. Spiridon, R. Bodirlau and C.-A. Teaca, *Open Life Sciences*, 2011, **6**, 388–396.
